# Supplementary material
Source: ML conference proceedings conference paper supplement (https://proceedings.mlr.press/v37/le15.html)
Supplement: Supplementary file 1 [file le15-supp.pdf]

---

# Supplementary Material for: Unsupervised Riemannian Metric Learning for Histograms Using Aitchison Transformations\*

---

**Tam Le**  
Graduate School of Informatics,  
Kyoto University, Japan.  
tam.le@iip.ist.i.kyoto-u.ac.jp

**Marco Cuturi**  
Graduate School of Informatics,  
Kyoto University, Japan.  
mcuturi@i.kyoto-u.ac.jp

## 1 Proof for Proposition 1

The  $j^{th}$  component of the tangent vector of the positive sphere, mapped by a push-forward map  $F_*$  on a tangent vector  $\mathbf{v} \in T_{\mathbf{x}}\mathbb{P}_n$

$$[F_*\mathbf{v}]_j = \frac{d}{dt} \sqrt{\frac{(\mathbf{x}_j + t\mathbf{v}_j)^{\alpha_j} \lambda_j}{\sum_{i=1}^{n+1} (\mathbf{x}_i + t\mathbf{v}_i)^{\alpha_i} \lambda_i}} \Big|_{t=0},$$

For simplify, let denote:

$$\begin{aligned} f_i(t) &= (\mathbf{x}_i + t\mathbf{v}_i)^{\alpha_i} \lambda_i, \\ h_i(t) &= \frac{df_i(t)}{dt} = (\mathbf{x}_i + t\mathbf{v}_i)^{\alpha_i-1} \lambda_i \alpha_i \mathbf{v}_i. \end{aligned}$$

So, we have:

$$[F_*\mathbf{v}]_j = \frac{h_j(t) \sum_{i=1}^{n+1} f_i(t) - f_j(t) \sum_{i=1}^{n+1} h_i(t)}{2 \sqrt{\frac{f_j(t)}{\sum_{i=1}^{n+1} f_i(t)} \left( \sum_{i=1}^{n+1} f_i(t) \right)^2}} \Big|_{t=0}$$

Since at  $t = 0$ ,  $f_i(0) = \mathbf{x}_i^{\alpha_i} \lambda_i$  and  $h_i(0) = \mathbf{x}_i^{\alpha_i-1} \lambda_i \alpha_i \mathbf{v}_i$ ,

$$\begin{aligned} [F_*\mathbf{v}]_j &= \frac{1}{2} \mathbf{x}_j^{\frac{\alpha_j}{2}-1} \alpha_j \mathbf{v}_j \lambda_j^{\frac{1}{2}} \left( \sum_{\ell=1}^{n+1} \mathbf{x}_\ell^{\alpha_\ell} \lambda_\ell \right)^{-\frac{1}{2}} \\ &\quad - \frac{1}{2} \mathbf{x}_j^{\frac{\alpha_j}{2}} \lambda_j^{\frac{1}{2}} \frac{\sum_{\ell=1}^{n+1} \mathbf{x}_\ell^{\alpha_\ell-1} \alpha_\ell \mathbf{v}_\ell \lambda_\ell}{\left( \sum_{\ell=1}^{n+1} \mathbf{x}_\ell^{\alpha_\ell} \lambda_\ell \right)^{\frac{3}{2}}} \end{aligned}$$

Let apply  $\mathbf{v} = \partial_i$ ,  $1 \leq i \leq n$ , the basis of the tangent space of the simplex  $T_{\mathbf{x}}\mathbb{P}_n$

$$\begin{aligned} [F_*\partial_i]_j &= \frac{1}{2} \mathbf{x}_j^{\frac{\alpha_j}{2}-1} \alpha_j \lambda_j^{\frac{1}{2}} \left( \sum_{\ell=1}^{n+1} \mathbf{x}_\ell^{\alpha_\ell} \lambda_\ell \right)^{-\frac{1}{2}} (\delta_{j,i} - \delta_{j,n+1}) \\ &\quad - \frac{1}{2} \mathbf{x}_j^{\frac{\alpha_j}{2}} \lambda_j^{\frac{1}{2}} \frac{\mathbf{x}_i^{\alpha_i-1} \alpha_i \lambda_i - \mathbf{x}_{n+1}^{\alpha_{n+1}-1} \alpha_{n+1} \lambda_{n+1}}{\left( \sum_{\ell=1}^{n+1} \mathbf{x}_\ell^{\alpha_\ell} \lambda_\ell \right)^{\frac{3}{2}}}, \end{aligned}$$

---

\*Proceedings of the 32<sup>nd</sup> International Conference on Machine Learning, Lille, France, 2015. JMLR: W&CP volume 37. Copyright 2015 by author(s).

where  $\delta_{j,i} = 1$  if  $j = i$  and  $\delta_{j,i} = 0$ , otherwise.

Hence, we have  $T = U(I - \beta\eta^T)D$ .

Moreover, the metric on the positive sphere  $\mathbb{S}_n^+$  is Euclidean. So, we have  $J(\partial_i, \partial_j) = \langle F_*\partial_i, F_*\partial_j \rangle$ . Consequently, we have the Gram matrix:

$$\mathcal{G} = TT^T = U(I - \beta\eta^T)D^2(I - \beta\eta^T)^T U^T.$$

## 2 Proof for Proposition 2

Let consider matrix  $\beta\eta^T \in \mathbb{R}^{(n+1) \times (n+1)}$ , and vector  $\mathbf{v}$  such that  $\eta^T \mathbf{v} = 0$ , so  $\mathbf{v}$  is a eigenvector of  $\beta\eta^T$  with eigenvalue 0. There are  $n$  independent vectors  $\{\mathbf{v}_i\}_{1 \leq i \leq n}$  such that  $\eta^T \mathbf{v}_i = 0$ . Moreover,  $\text{trace}(\beta\eta^T) = \sum_{i=1}^{n+1} \beta_i \eta_i = 1$ , or sum of the eigenvalues of  $\beta\eta^T$  is 1. So, the last of  $(n+1)$  eigenvalues is 1. On the other hand,  $(\beta\eta^T)\beta = \beta(\eta^T\beta) = \beta$ , or  $\beta$  is a eigenvector of  $\beta\eta^T$  with eigenvalue 1. In summary, we have  $\{(\mathbf{v}_i, 0)_{1 \leq i \leq n}, (\beta, 1)\}$  are eigenvectors and corresponding eigenvalues of  $\beta\eta^T$ . Let  $V$  be a matrix in  $\mathbb{R}^{(n+1) \times (n+1)}$  whose columns are  $\{\mathbf{v}_1, \mathbf{v}_2, \dots, \mathbf{v}_n, \beta\}$ . So, we may express  $V$  as follow:

$$V = \begin{bmatrix} -\frac{\mathbf{x}_2 \alpha_1}{\alpha_2 \mathbf{x}_1} & \dots & -\frac{\mathbf{x}_{n+1} \alpha_1}{\alpha_{n+1} \mathbf{x}_1} & \mathbf{x}_1^{\alpha_1 - 1} \alpha_1 \lambda_1 \\ 1 & \dots & 0 & \mathbf{x}_1^{\alpha_2 - 1} \alpha_2 \lambda_2 \\ \vdots & \ddots & \vdots & \vdots \\ 0 & \dots & 1 & \mathbf{x}_{n+1}^{\alpha_{n+1} - 1} \alpha_{n+1} \lambda_{n+1} \end{bmatrix}.$$

Let  $\Lambda$  is a diagonal matrix in  $\mathbb{R}^{(n+1) \times (n+1)}$  where  $\Lambda_{ii} = 0$ , for all  $1 \leq i \leq n$ , and  $\Lambda_{(n+1)(n+1)} = 1$ . We have  $\beta\eta^T = V\Lambda V^{-1}$ . Consequently, we have  $I - \beta\eta^T = V(I - \Lambda)V^{-1}$ . Since  $I - \Lambda = \text{diag}(1, 1, \dots, 1, 0)$  and  $I - \Lambda = (I - \Lambda)^2$ , we may express  $I - \beta\eta^T = \tilde{V}\tilde{V}^{-1}$ , where  $\tilde{V} \in \mathbb{R}^{(n+1) \times n}$  is the matrix  $V$  whose last column is removed, and  $\tilde{V}^{-1} \in \mathbb{R}^{n \times (n+1)}$  is the matrix  $V^{-1}$  whose last row is removed.

Thus, we can express the Gram matrix  $\mathcal{G}$  as follow:

$$\begin{aligned} \mathcal{G} &= U\tilde{V}\tilde{V}^{-1}D^2(\tilde{V}\tilde{V}^{-1})^T U^T \\ &= (U\tilde{V})(\tilde{V}^{-1}D^2\tilde{V}^{-1})^T (U\tilde{V})^T \end{aligned}$$

We also note that  $U\tilde{V}$  and  $\tilde{V}^{-1}D^2\tilde{V}^{-1}$  are matrices in  $\mathbb{R}^{n \times n}$ . So, we have  $\det \mathcal{G} = \det^2(U\tilde{V}) \det(\tilde{V}^{-1}D^2\tilde{V}^{-1})$ .

**Compute  $\det(U\tilde{V})$ :** Since, we have

$$\begin{aligned} U\tilde{V} &= \begin{pmatrix} -\frac{\mathbf{x}_2 \alpha_1}{\alpha_2 \mathbf{x}_1} & \dots & -\frac{\mathbf{x}_n \alpha_1}{\alpha_n \mathbf{x}_1} & -\frac{\mathbf{x}_{n+1} \alpha_1}{\alpha_{n+1} \mathbf{x}_1} & -1 \\ 1 & \dots & 0 & -1 & \\ \vdots & \ddots & \vdots & \vdots & \\ 0 & \dots & 1 & -1 & \end{pmatrix} \\ &= \frac{\alpha_1}{\mathbf{x}_1} \begin{pmatrix} -\sum_{i=1}^{n+1} \frac{\mathbf{x}_i}{\alpha_i} & -\frac{\mathbf{x}_3}{\alpha_3} & \dots & -\frac{\mathbf{x}_n}{\alpha_n} & -\frac{\mathbf{x}_{n+1}}{\alpha_{n+1}} - \frac{\mathbf{x}_1}{\alpha_1} \\ 0 & 0 & \dots & 0 & -1 \\ 0 & 1 & \dots & 0 & -1 \\ \vdots & \vdots & \ddots & \vdots & \vdots \\ 0 & 0 & \dots & 1 & -1 \end{pmatrix}. \end{aligned}$$

Therefore,  $\det(U\tilde{V}) = (-1)^n \frac{\alpha_1}{\mathbf{x}_1} \sum_{i=1}^{n+1} \frac{\mathbf{x}_i}{\alpha_i}$ .

**Compute  $\det(\widetilde{V}^{-1}D^2\widetilde{V}^{-1}{}^T)$ :** Let consider a  $(n+1) \times (n+1)$  matrix

$$W = \begin{pmatrix} -\frac{\mathbf{r}_2}{\mathbf{r}_1} & \cdots & -\frac{\mathbf{r}_{n+1}}{\mathbf{r}_1} & \mathbf{c}_1 \\ 1 & \cdots & 0 & \mathbf{c}_2 \\ \vdots & \ddots & \vdots & \vdots \\ 0 & \cdots & 1 & \mathbf{c}_{n+1} \end{pmatrix}$$

We have its inverse:

$$W^{-1} = \frac{1}{\langle \mathbf{r}, \mathbf{c} \rangle} \begin{pmatrix} -\mathbf{r}_1 \mathbf{c}_2 & \langle \mathbf{r}, \mathbf{c} \rangle - \mathbf{r}_2 \mathbf{c}_2 & -\mathbf{r}_3 \mathbf{c}_2 & \cdots & -\mathbf{r}_{n+1} \mathbf{c}_2 \\ -\mathbf{r}_1 \mathbf{c}_3 & -\mathbf{r}_2 \mathbf{c}_3 & \langle \mathbf{r}, \mathbf{c} \rangle - \mathbf{r}_2 \mathbf{c}_3 & \cdots & -\mathbf{r}_{n+1} \mathbf{c}_3 \\ \vdots & \vdots & \vdots & \ddots & \vdots \\ -\mathbf{r}_1 \mathbf{c}_{n+1} & -\mathbf{r}_2 \mathbf{c}_{n+1} & -\mathbf{r}_2 \mathbf{c}_{n+1} & \cdots & \langle \mathbf{r}, \mathbf{c} \rangle - \mathbf{r}_{n+1} \mathbf{c}_{n+1} \\ \mathbf{r}_1 & \mathbf{r}_2 & \mathbf{r}_3 & \cdots & \mathbf{r}_{n+1} \end{pmatrix},$$

where vector  $\mathbf{r} = (\mathbf{r}_1, \mathbf{r}_2, \dots, \mathbf{r}_{n+1})$  and vector  $\mathbf{c} = (\mathbf{c}_1, \mathbf{c}_2, \dots, \mathbf{c}_{n+1})$  are in  $\mathbb{R}^{n+1}$ .

Now, we apply for the matrix  $V$  where  $\mathbf{r}_i = \frac{\mathbf{x}_i}{\alpha_i}$  and  $\mathbf{c}_i = \mathbf{x}_i^{\alpha_i-1} \alpha_i \lambda_i$ , for all  $1 \leq i \leq (n+1)$ , and remove the last row to form  $\widetilde{V}^{-1}$ . For simplicity, we denote a diagonal matrix  $P \in \mathbb{R}^{n \times n}$  where  $P_{ii} = \mathbf{x}_{i+1}^{\alpha_{i+1}-1} \alpha_{i+1} \lambda_{i+1}$ , for all  $1 \leq i \leq n$  and matrix  $Q \in \mathbb{R}^{n \times (n+1)}$  as follow:

$$Q = \begin{pmatrix} -\frac{\mathbf{x}_1}{\alpha_1} & \sum_{\substack{1 \leq i \leq n+1 \\ i \neq 2}} \frac{\mathbf{x}_i^{\alpha_i} \lambda_i}{\mathbf{x}_2^{\alpha_2-1} \alpha_2 \lambda_2} & -\frac{\mathbf{x}_3}{\alpha_3} & \cdots & -\frac{\mathbf{x}_{n+1}}{\alpha_{n+1}} \\ -\frac{\mathbf{x}_1}{\alpha_1} & -\frac{\mathbf{x}_2}{\alpha_2} & \sum_{\substack{1 \leq i \leq n+1 \\ i \neq 3}} \frac{\mathbf{x}_i^{\alpha_i} \lambda_i}{\mathbf{x}_3^{\alpha_3-1} \alpha_3 \lambda_3} & \cdots & -\frac{\mathbf{x}_{n+1}}{\alpha_{n+1}} \\ \vdots & \vdots & \vdots & \ddots & \vdots \\ -\frac{\mathbf{x}_1}{\alpha_1} & -\frac{\mathbf{x}_2}{\alpha_2} & -\frac{\mathbf{x}_3}{\alpha_3} & \cdots & \sum_{i=1}^n \frac{\mathbf{x}_i^{\alpha_i} \lambda_i}{\mathbf{x}_{n+1}^{\alpha_{n+1}-1} \alpha_{n+1} \lambda_{n+1}} \end{pmatrix}.$$

So, we have

$$\widetilde{V}^{-1} = \frac{1}{\sum_{i=1}^{n+1} \mathbf{x}_i^{\alpha_i} \lambda_i} P Q.$$

Then, we can compute

$$\widetilde{V}^{-1}D = \frac{1}{2 \left( \sum_{i=1}^{n+1} \mathbf{x}_i^{\alpha_i} \lambda_i \right)^{\frac{3}{2}}} P \begin{pmatrix} -\sqrt{\mathbf{x}_1^{\alpha_1} \lambda_1} & \sum_{\substack{1 \leq i \leq n+1 \\ i \neq 2}} \frac{\mathbf{x}_i^{\alpha_i} \lambda_i}{\sqrt{\mathbf{x}_2^{\alpha_2} \lambda_2}} & -\sqrt{\mathbf{x}_3^{\alpha_3} \lambda_3} & \cdots & -\sqrt{\mathbf{x}_{n+1}^{\alpha_{n+1}} \lambda_{n+1}} \\ -\sqrt{\mathbf{x}_1^{\alpha_1} \lambda_1} & \sqrt{\mathbf{x}_2^{\alpha_2} \lambda_2} & \sum_{\substack{1 \leq i \leq n+1 \\ i \neq 3}} \frac{\mathbf{x}_i^{\alpha_i} \lambda_i}{\mathbf{x}_3^{\alpha_3-1} \alpha_3 \lambda_3} & \cdots & -\sqrt{\mathbf{x}_{n+1}^{\alpha_{n+1}} \lambda_{n+1}} \\ \vdots & \vdots & \vdots & \ddots & \vdots \\ -\sqrt{\mathbf{x}_1^{\alpha_1} \lambda_1} & \sqrt{\mathbf{x}_2^{\alpha_2} \lambda_2} & -\sqrt{\mathbf{x}_3^{\alpha_3} \lambda_3} & \cdots & \sum_{i=1}^n \frac{\mathbf{x}_i^{\alpha_i} \lambda_i}{\sqrt{\mathbf{x}_{n+1}^{\alpha_{n+1}} \lambda_{n+1}}} \end{pmatrix}.$$

Consequently, we have:

$$\widetilde{V}^{-1}D^2\widetilde{V}^{-1}{}^T = \frac{1}{4 \left( \sum_{i=1}^{n+1} \mathbf{x}_i^{\alpha_i} \lambda_i \right)^2} P (\widehat{Q} - \mathbf{1}_{n \times n}) P,$$

where  $\widehat{Q}$  is a diagonal matrix in  $\mathbb{R}^{n \times n}$ ,  $\widehat{Q}_{ii} = \sum_{j=1}^{n+1} \frac{\mathbf{x}_j^{\alpha_j} \lambda_j}{\mathbf{x}_{i+1}^{\alpha_{i+1}} \lambda_{i+1}}$  and  $\mathbf{1}_{n \times n}$  is a matrix of 1 in  $\mathbb{R}^{n \times n}$ .

Moreover,  $\det(\widehat{Q} - \mathbf{1}_{n \times n}) = \prod_{i=1}^n Q_{ii} - \sum_{i=1}^n \prod_{j \neq i} Q_{jj}$ , following Lemma 2 of Lebanon (2005).

Hence, we have:

$$\det(\widehat{Q} - \mathbf{1}_{n \times n}) = \frac{\left( \sum_{i=1}^{n+1} \mathbf{x}_i^{\alpha_i} \boldsymbol{\lambda}_i \right)^{n-1}}{\prod_{j=1}^{n+1} \mathbf{x}_j^{\alpha_j} \boldsymbol{\lambda}_j} (\mathbf{x}_1^{\alpha_1} \boldsymbol{\lambda}_1)^2.$$

Consequently, we have

$$\begin{aligned} \det\left(\widetilde{V}^{-1} D^2 \widetilde{V}^{-1 T}\right) &= \frac{1}{4^n \left( \sum_{i=1}^{n+1} \mathbf{x}_i^{\alpha_i} \boldsymbol{\lambda}_i \right)^{2n}} \det^2(P) \det(\widehat{Q} - \mathbf{1}_{n \times n}). \end{aligned}$$

Since  $\det(P) = \prod_{j=2}^{n+1} \mathbf{x}_j^{\alpha_j - 1} \alpha_j \boldsymbol{\lambda}_j$ , we have:

$$\det\left(\widetilde{V}^{-1} D^2 \widetilde{V}^{-1 T}\right) = \frac{\left( \frac{\mathbf{x}_1}{\alpha_1} \right)^2 \left( \prod_{i=1}^{n+1} \mathbf{x}_i^{\alpha_i - 2} \alpha_i^2 \boldsymbol{\lambda}_i \right)}{4^n \left( \sum_{i=1}^{n+1} \mathbf{x}_i^{\alpha_i} \boldsymbol{\lambda}_i \right)^{n+1}}.$$

$$\text{Hence, we have: } \det \mathcal{G} = \frac{\left( \sum_{i=1}^{n+1} \frac{\mathbf{x}_i}{\alpha_i} \right)^2 \left( \prod_{i=1}^{n+1} \mathbf{x}_i^{\alpha_i - 2} \alpha_i^2 \boldsymbol{\lambda}_i \right)}{4^n \left( \sum_{i=1}^{n+1} \mathbf{x}_i^{\alpha_i} \boldsymbol{\lambda}_i \right)^{n+1}}.$$

### 3 Proof for Proposition 3

The partial derivative of the objective function  $\mathcal{F}$  with respect to  $\boldsymbol{\lambda}$  is:

$$\begin{aligned} \frac{\partial \mathcal{F}}{\partial \boldsymbol{\lambda}} &= \frac{1}{m} \sum_{i=1}^m \frac{\partial \log \text{dvol} g^{-1}(\mathbf{x}_i)}{\partial \boldsymbol{\lambda}} \\ &\quad - E \left( \frac{\partial \log \text{dvol} g^{-1}(\mathbf{x})}{\partial \boldsymbol{\lambda}} \right)_{p(\mathbf{x})} \end{aligned}$$

Since we have

$$\begin{aligned} &\frac{\partial \log \int_{\mathbb{P}_n} \text{dvol} J^{-1}(\mathbf{x}) \text{d}\mathbf{x}}{\partial \boldsymbol{\lambda}} \\ &= \frac{1}{\int_{\mathbb{P}_n} \text{dvol} J^{-1}(\mathbf{x}) \text{d}\mathbf{x}} \frac{\partial \int_{\mathbb{P}_n} \text{dvol} J^{-1}(\mathbf{x}) \text{d}\mathbf{x}}{\partial \boldsymbol{\lambda}} \\ &= \frac{1}{\int_{\mathbb{P}_n} \text{dvol} J^{-1}(\mathbf{x}) \text{d}\mathbf{x}} \int_{\mathbb{P}_n} \frac{\partial \text{dvol} J^{-1}(\mathbf{x})}{\partial \boldsymbol{\lambda}} \text{d}\mathbf{x} \\ &= \frac{1}{\int_{\mathbb{P}_n} \text{dvol} J^{-1}(\mathbf{x}) \text{d}\mathbf{x}} \int_{\mathbb{P}_n} \text{dvol} J^{-1}(\mathbf{x}) \frac{\partial \log \text{dvol} g^{-1}(\mathbf{x})}{\partial \boldsymbol{\lambda}} \text{d}\mathbf{x} \\ &= \int_{\mathbb{P}_n} \frac{\text{dvol} J^{-1}(\mathbf{x})}{\int_{\mathbb{P}_n} \text{dvol} J^{-1}(\mathbf{z}) \text{d}\mathbf{z}} \frac{\partial \log \text{dvol} g^{-1}(\mathbf{x})}{\partial \boldsymbol{\lambda}} \text{d}\mathbf{x} \\ &= E \left( \frac{\partial \log \text{dvol} J^{-1}(\mathbf{x})}{\partial \boldsymbol{\lambda}} \right)_{p(\mathbf{x})}. \end{aligned}$$

and

$$\frac{\partial \log \text{dvol} J^{-1}(\mathbf{x})}{\partial \boldsymbol{\lambda}} = \frac{n+1}{2 \sum_{i=1}^{n+1} \mathbf{x}_i^{\alpha_i} \boldsymbol{\lambda}_i} [\mathbf{x}_j^{\alpha_j}]_{1 \leq j \leq n+1}.$$

So, we have the proof for  $\frac{\partial \mathcal{F}}{\partial \lambda}$ .

Similarly, we also obtain the proof for  $\frac{\partial \mathcal{F}}{\partial \alpha}$ .

## References

G. Lebanon. *Riemannian Geometry and Statistical Machine Learning*. PhD thesis, CMU, 2005.
